# Supplementary material for: Long-term variations in pH in coastal waters along the Korean Peninsula
Source: Copernicus journal article supplement (doi:10.5194/bg-22-675-2025), 2025-02-06
Supplement: Supplementary file 1 [file bg-22-675-2025-supplement.pdf]

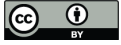

*Supplement of*

## **Long-term variations in pH in coastal waters along the Korean Peninsula**

**Yong-Woo Lee et al.**

*Correspondence to:* DongJoo Joung (dongjoo.joung@pusan.ac.kr)

The copyright of individual parts of the supplement might differ from the article licence.

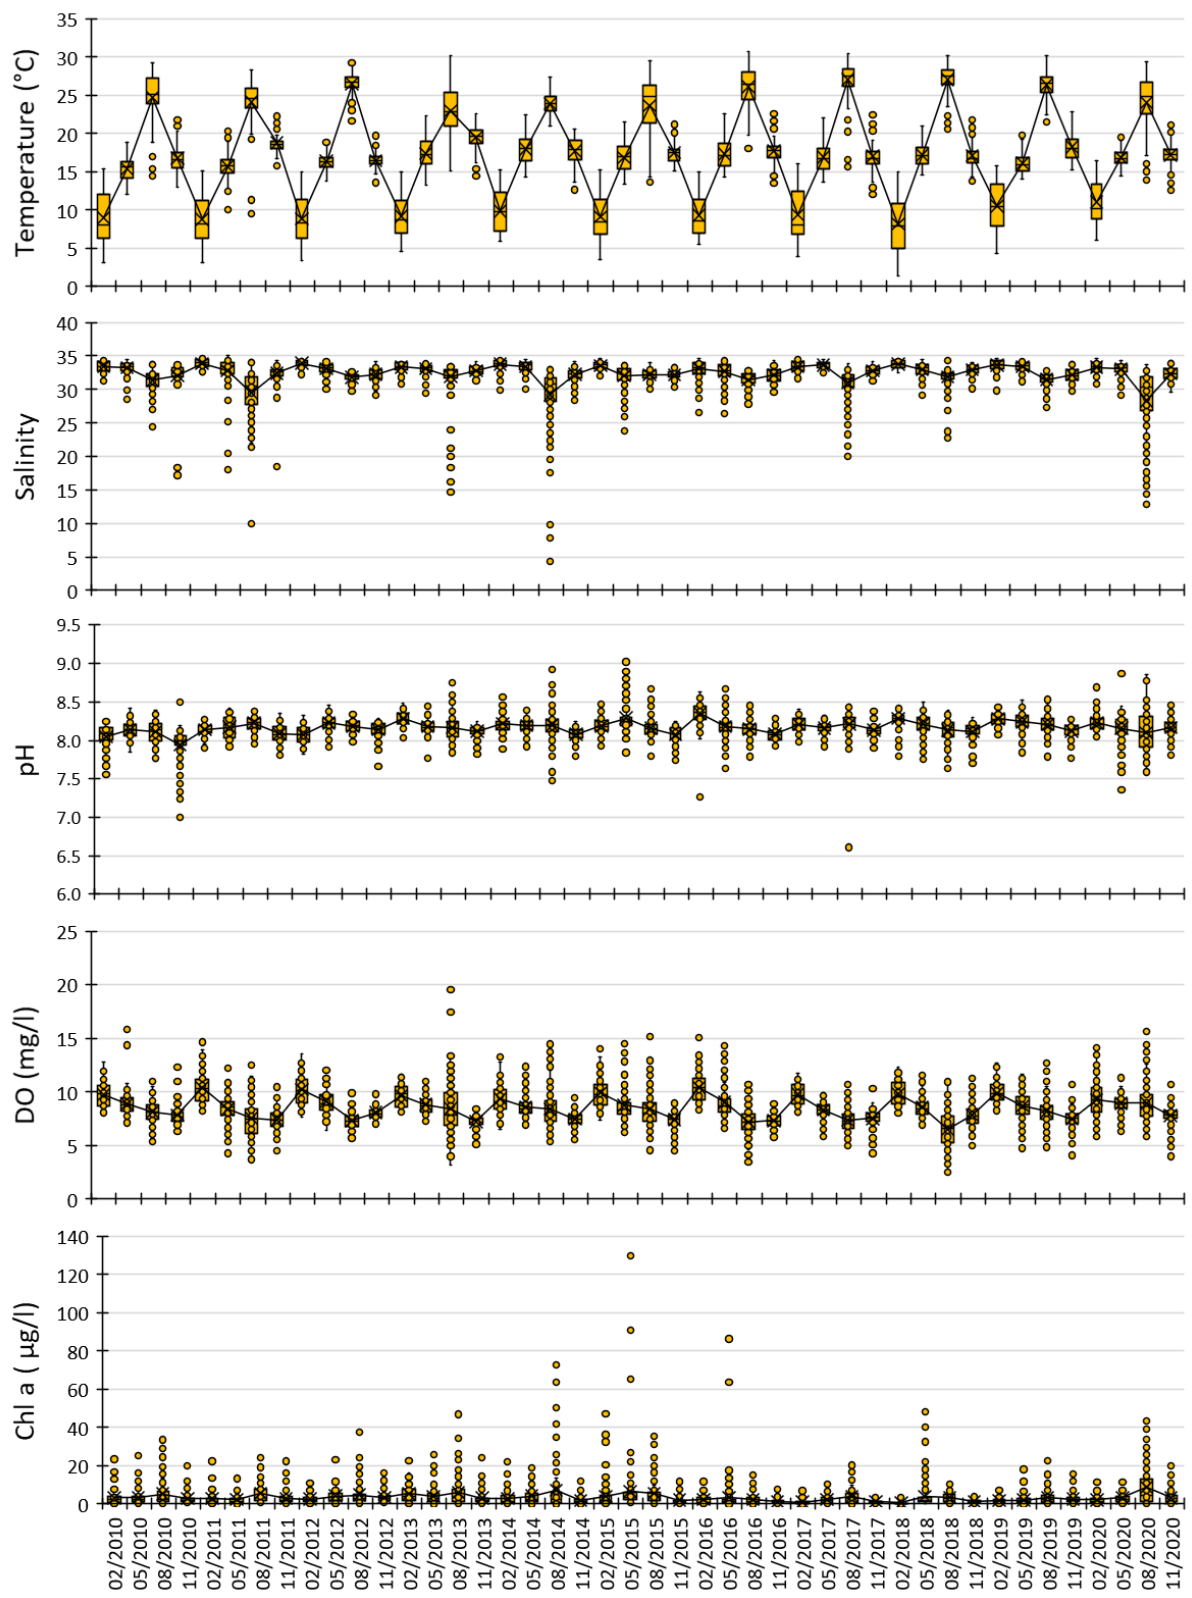

Figure S1. Variations in parameters of surface waters along the southern coast of Korea.

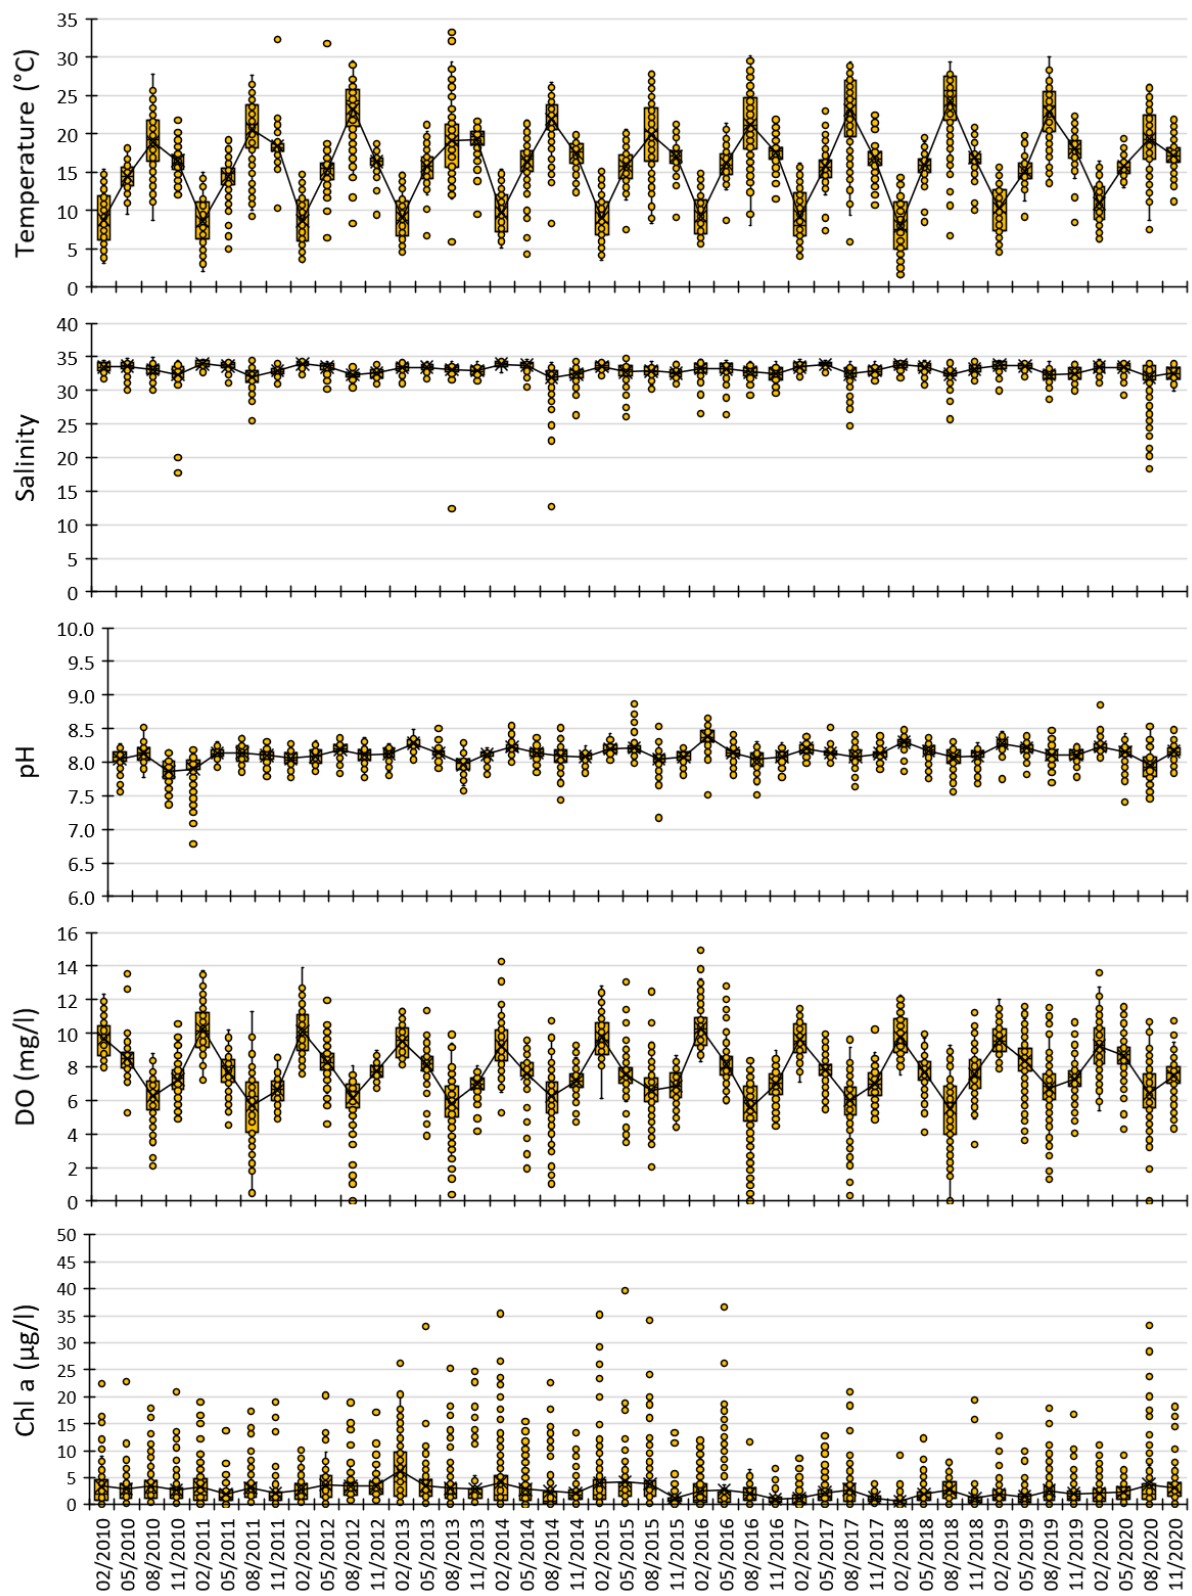

Figure S2. Variations of parameters of bottom waters along the southern coast of Korea.

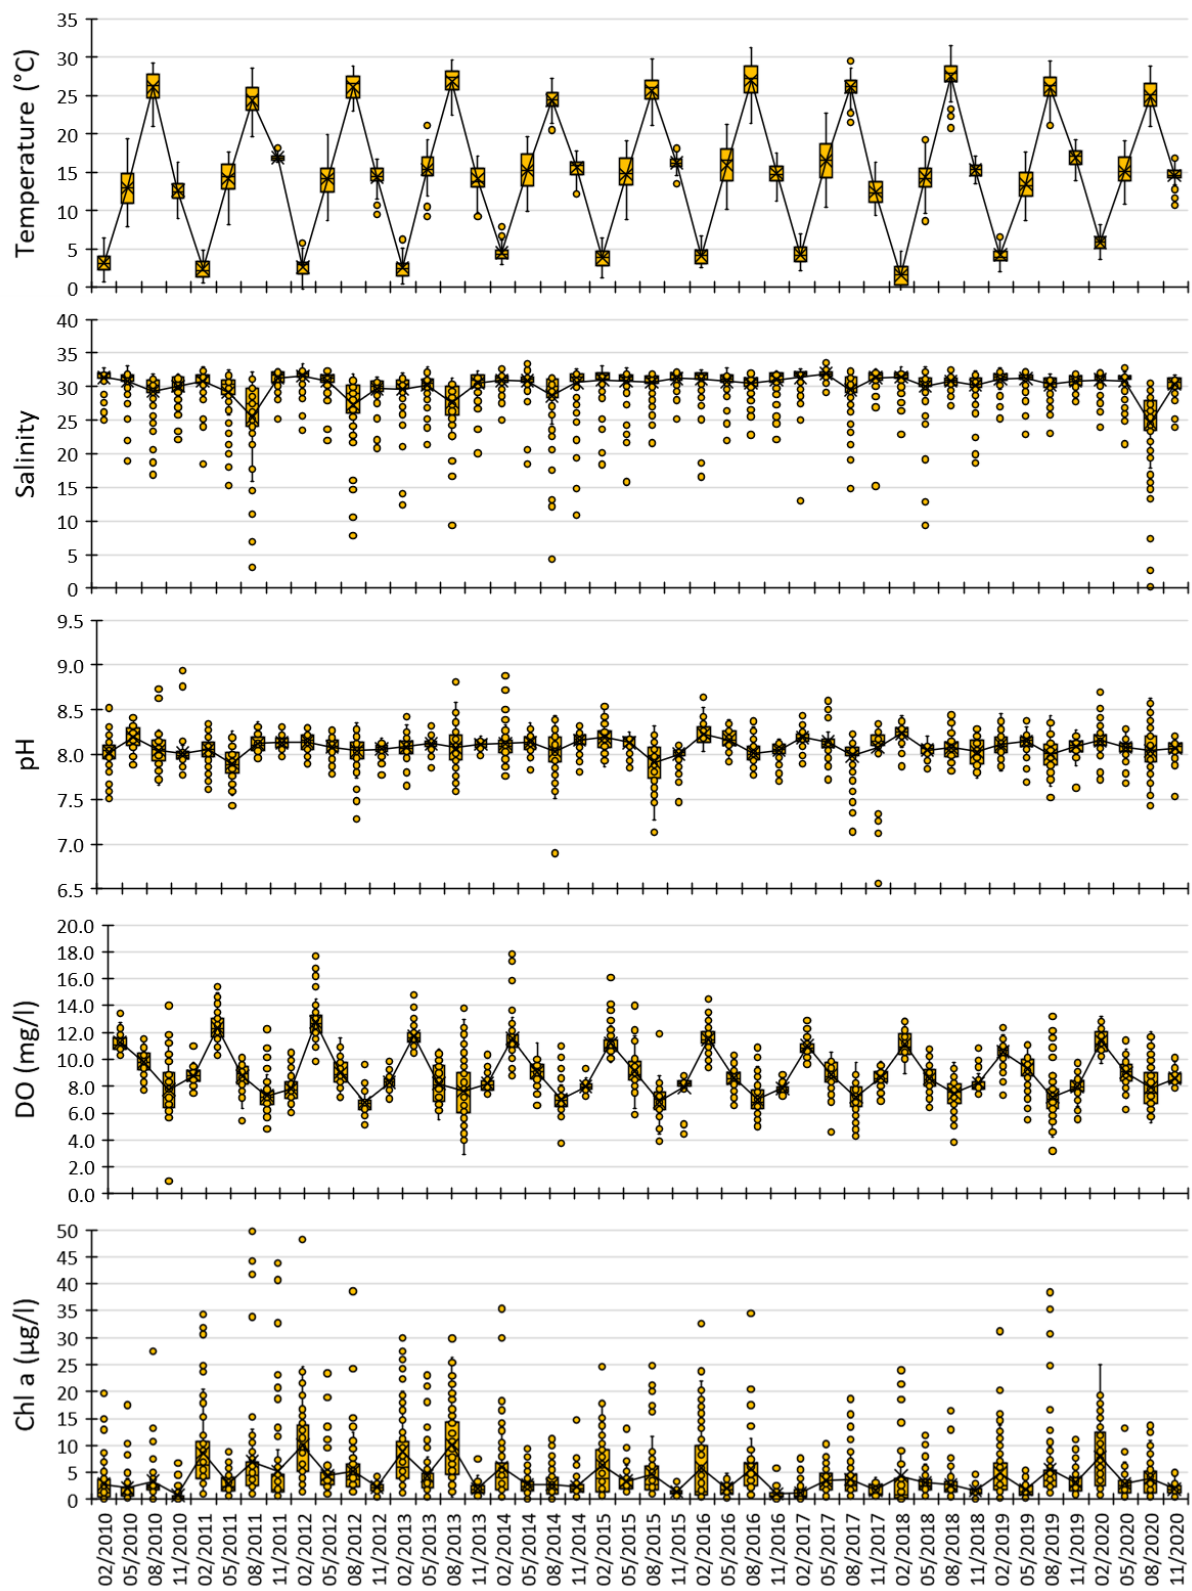

Figure S3. Variations of parameters of surface waters along the western coast of Korea.

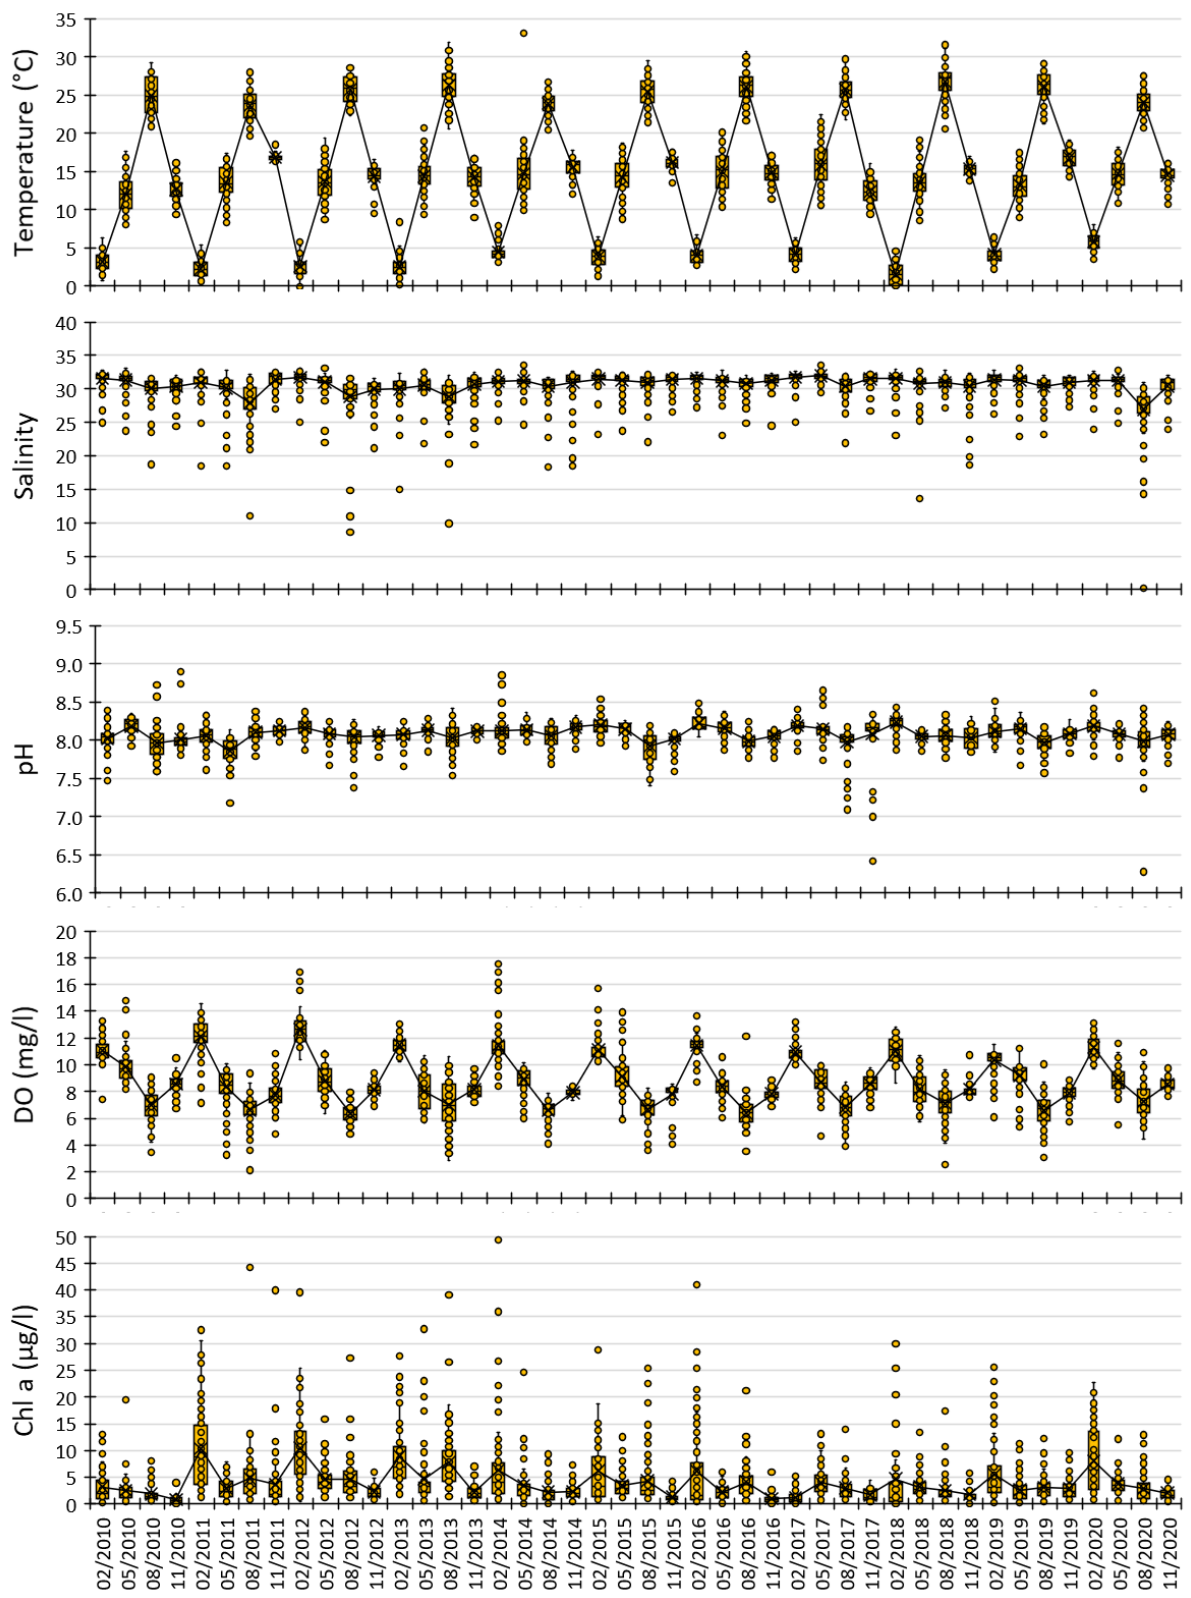

Figure S4. Variations of parameters of bottom waters along the western coast of Korea.

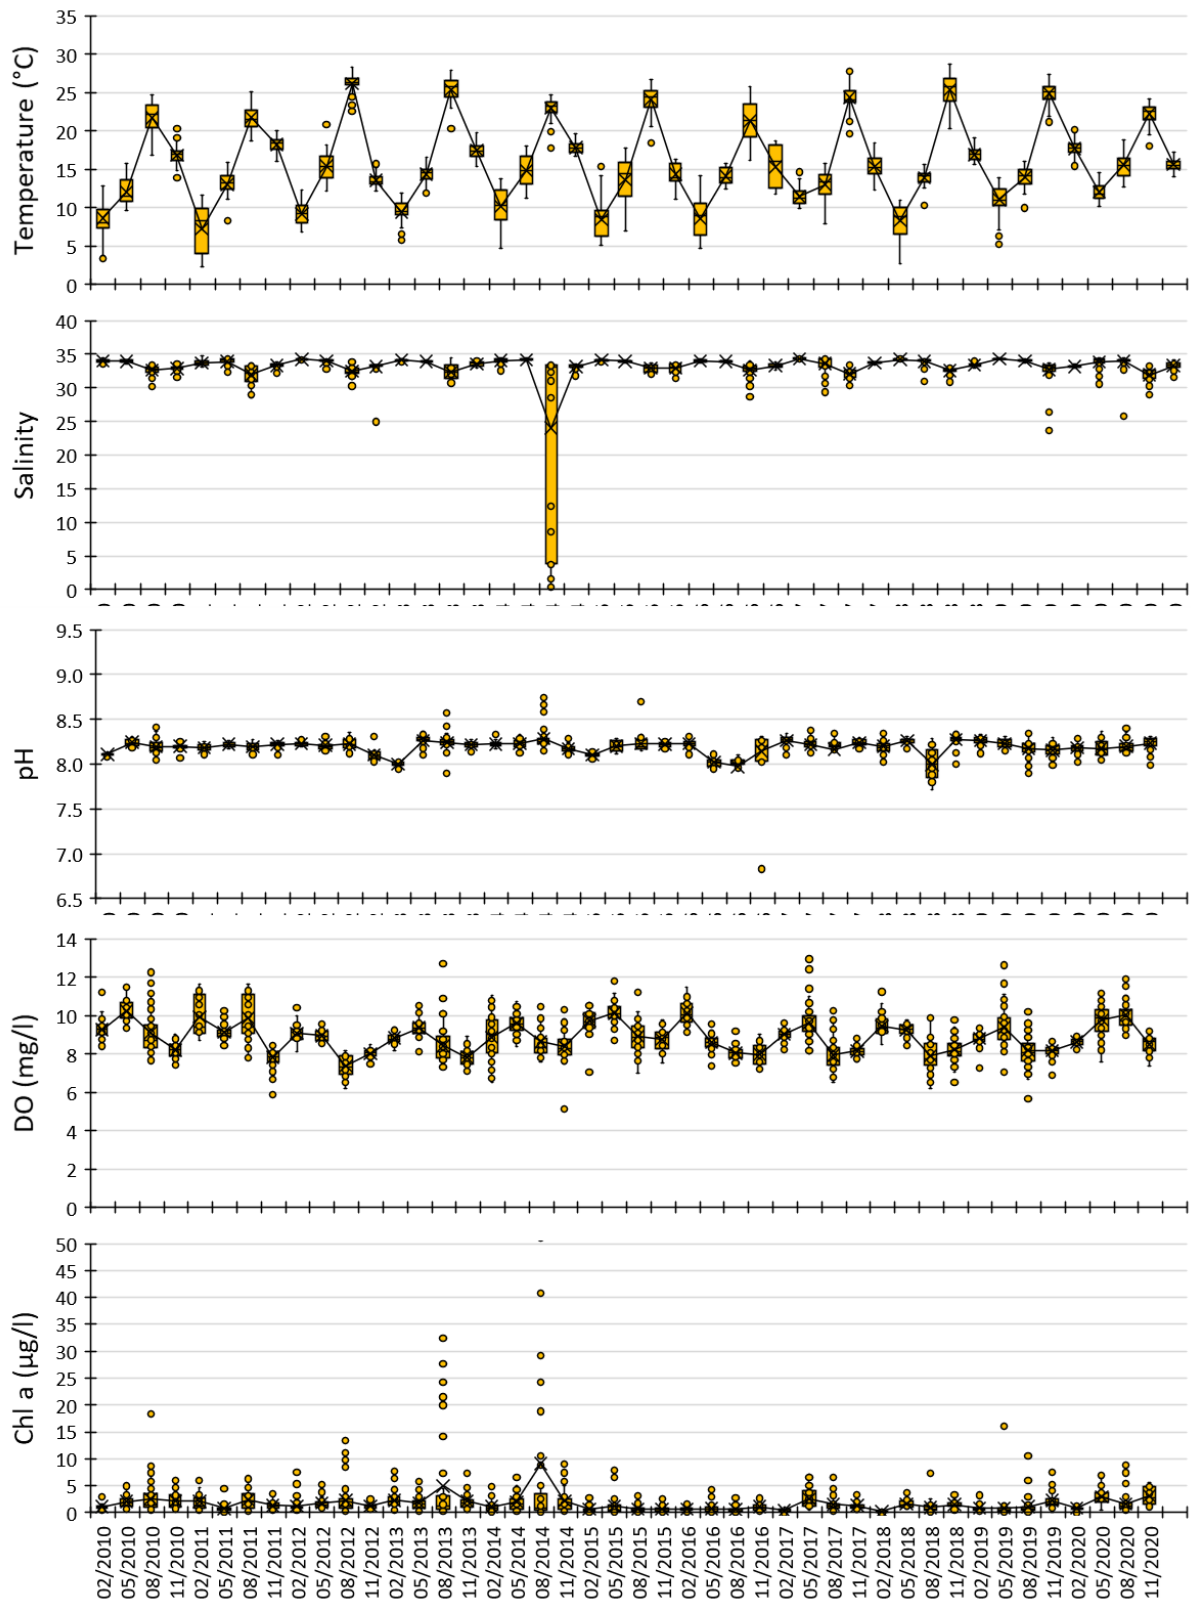

Figure S5. Variations of parameters of surface waters along the eastern coast of Korea.

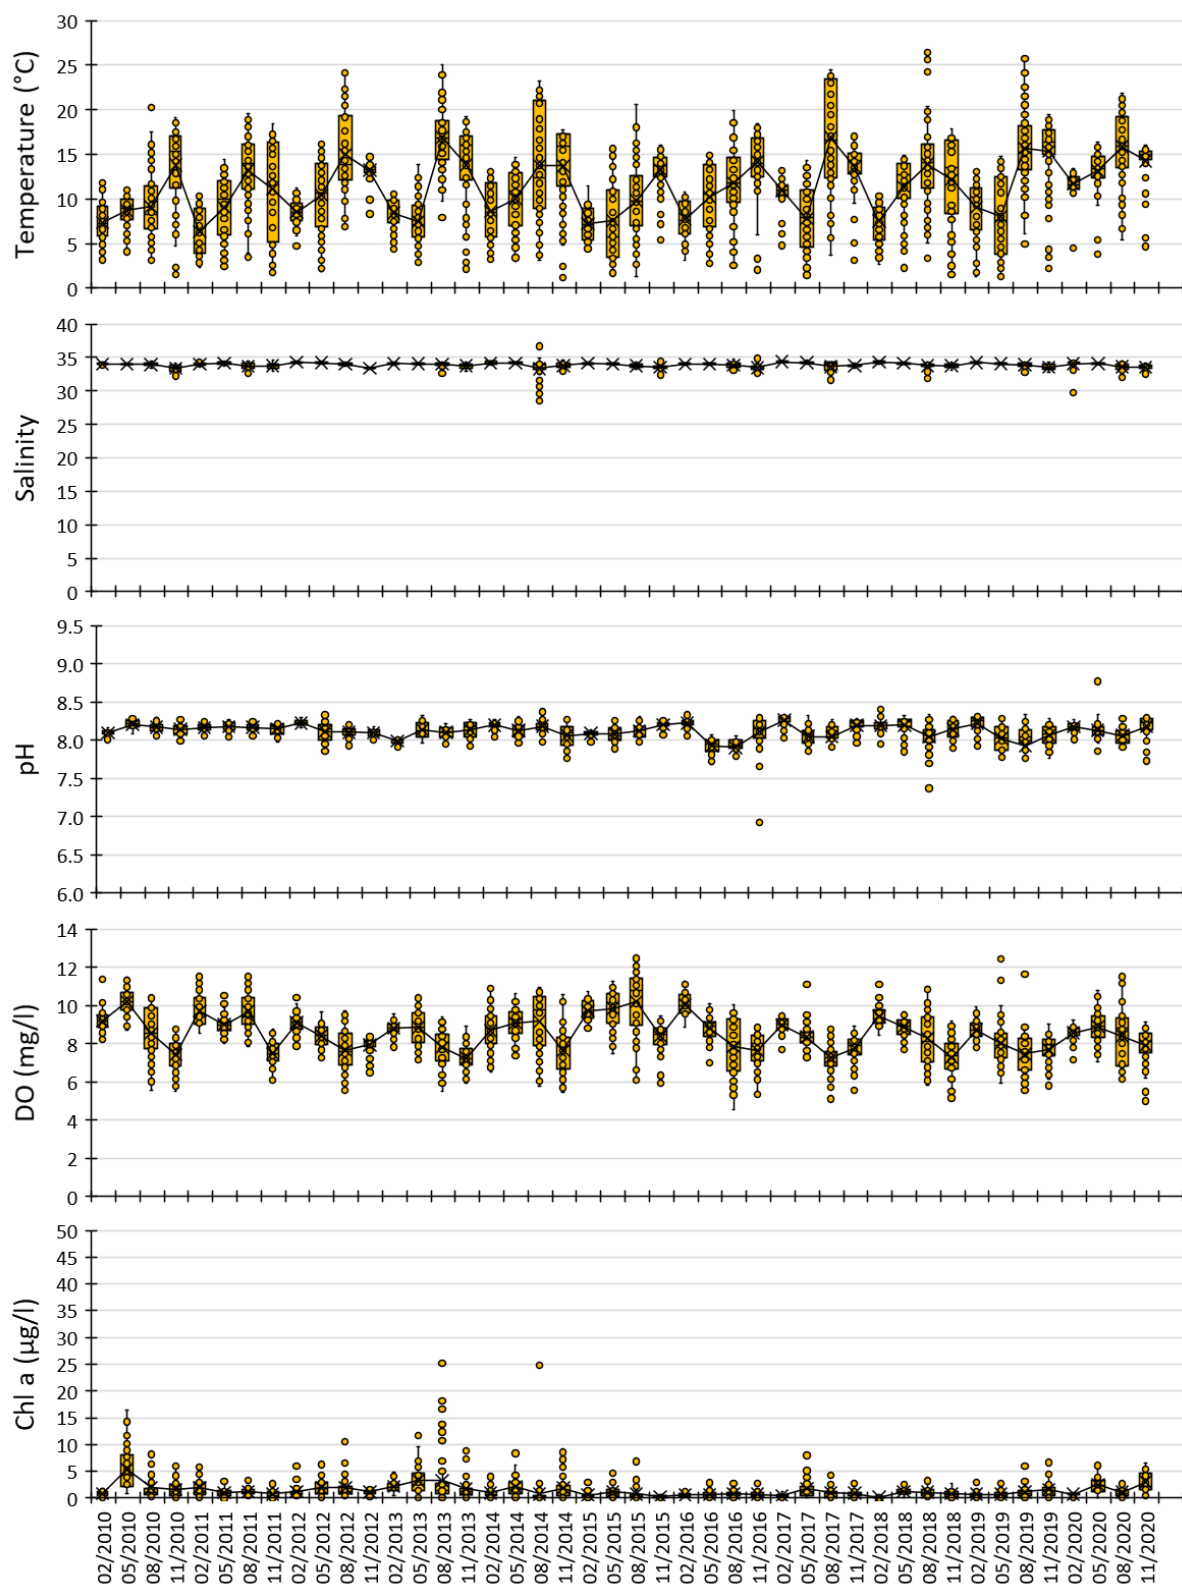

Figure S6. Variations of parameters of bottom waters along the eastern coast of Korea.

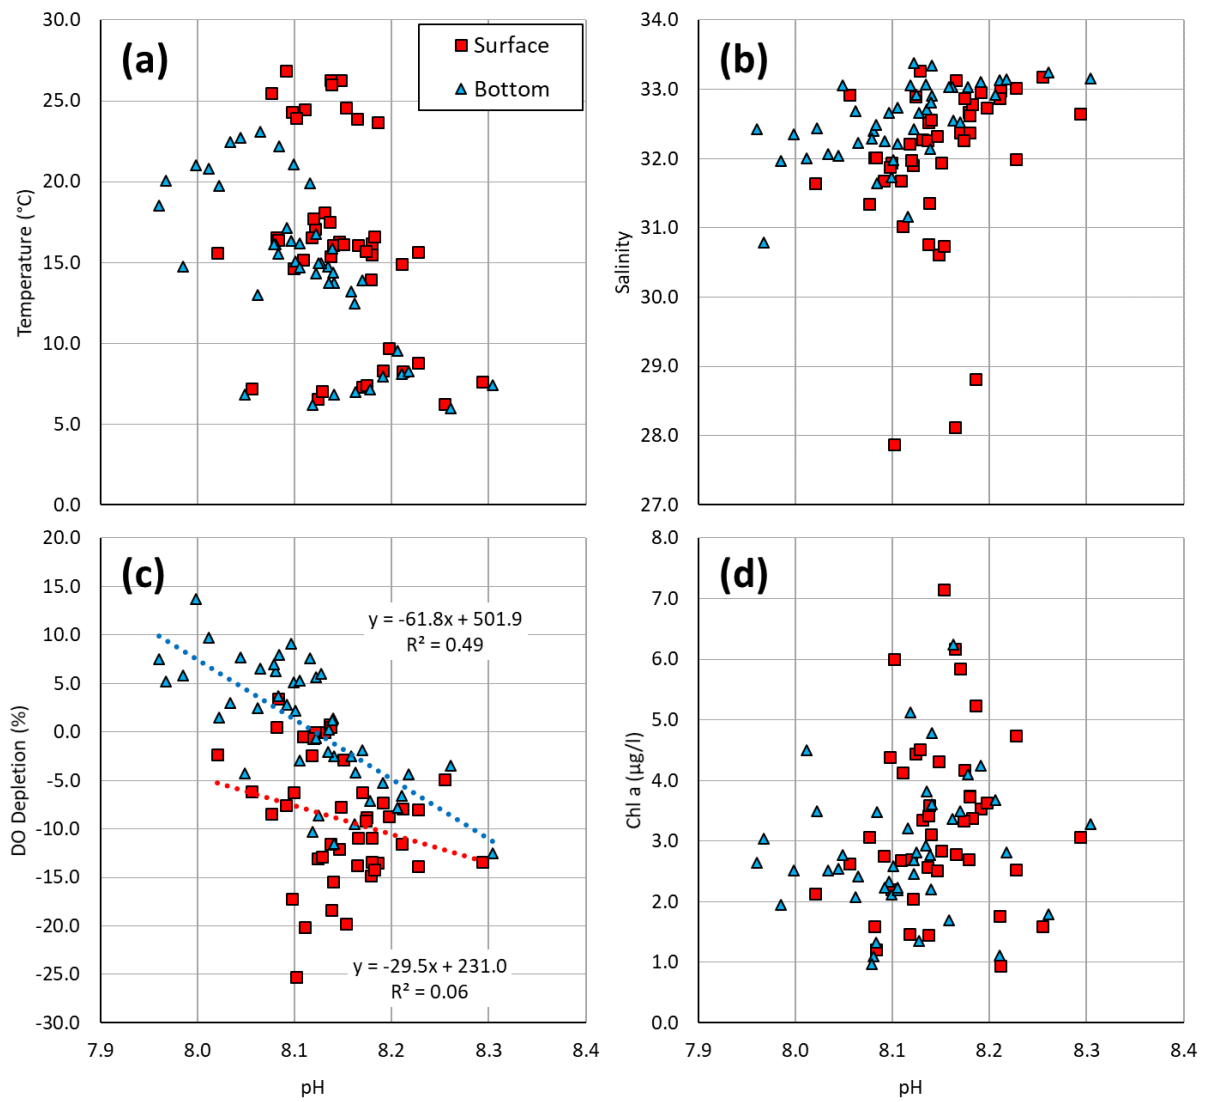

Figure S7. Variations of pH with (a) temperature, (b) salinity, (c) DO depletion, and (d) chlorophyll-a in waters from the entire Korean coast.



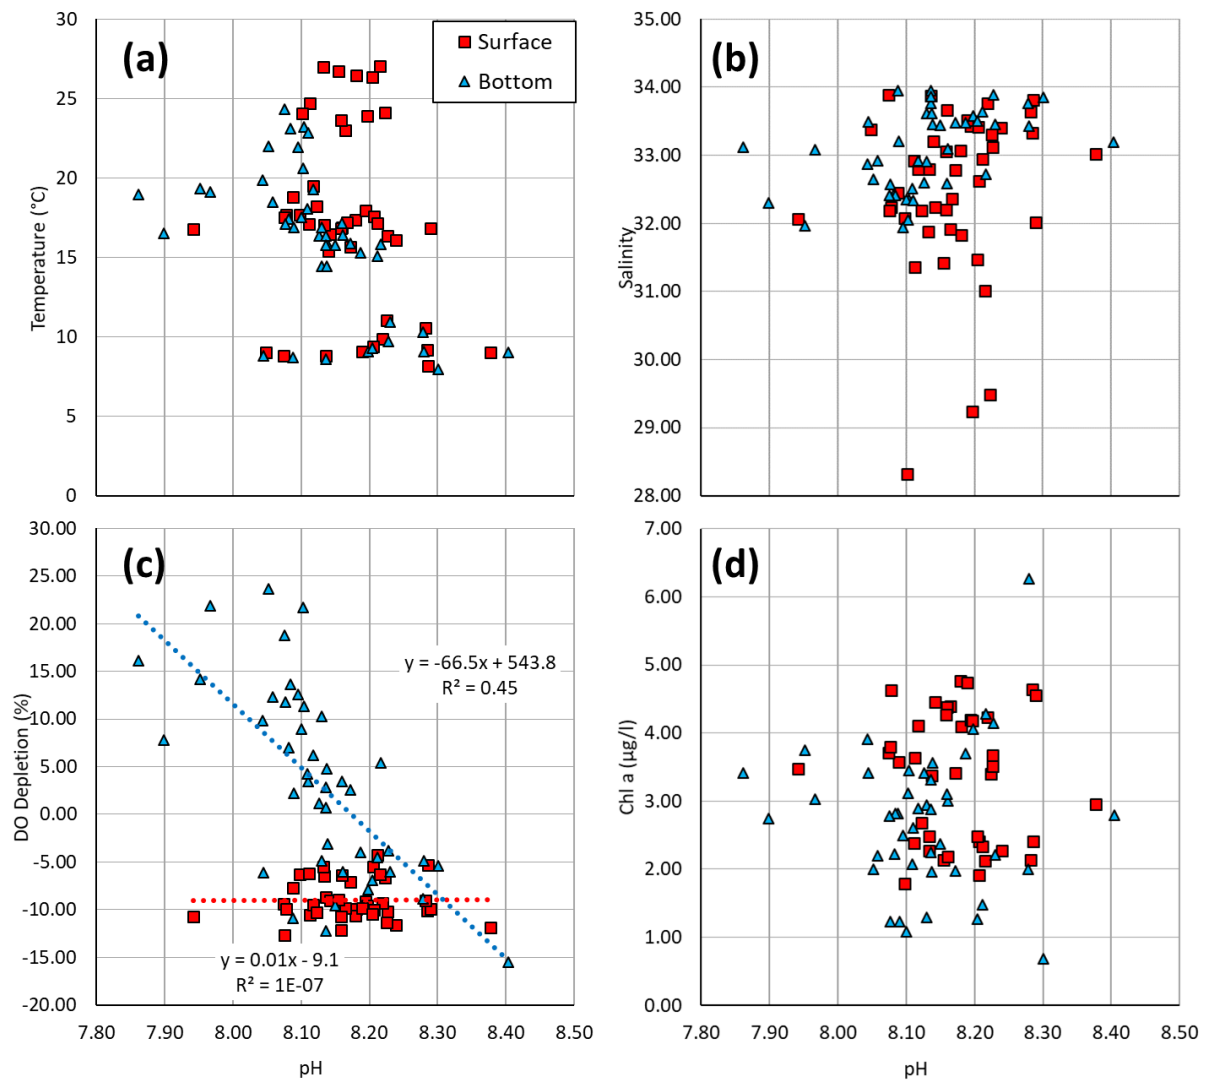

Figure S8. Variations of pH with (a) temperature, (b) salinity, (c) DO depletion, and (d) chlorophyll-a in waters from the south coast of Korea.

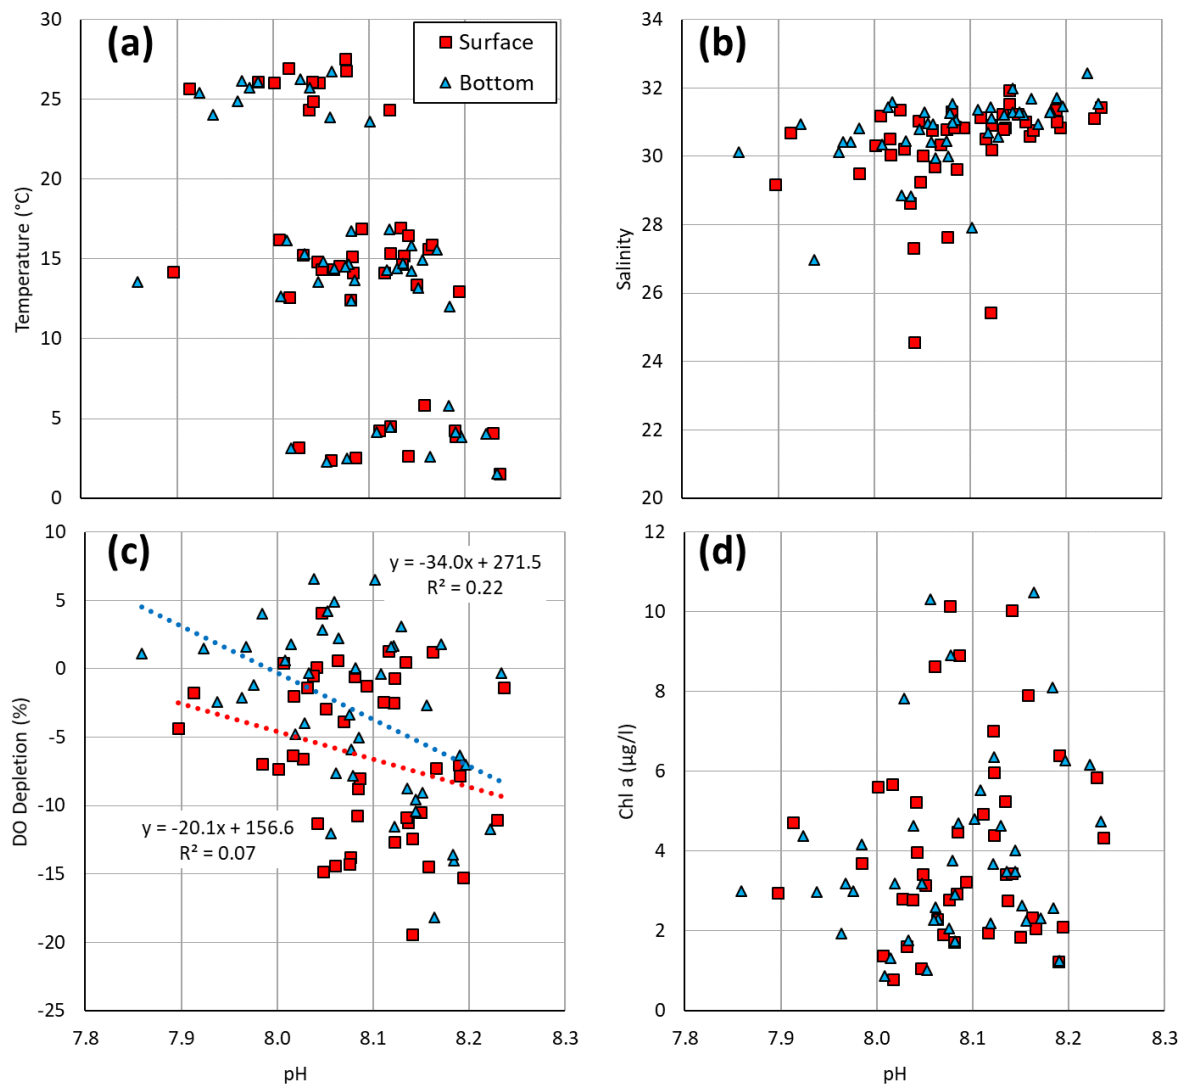

Figure S9. Variations of pH with (a) temperature, (b) salinity, (c) DO depletion, and (d) chlorophyll-a in waters from the west coast of Korea.

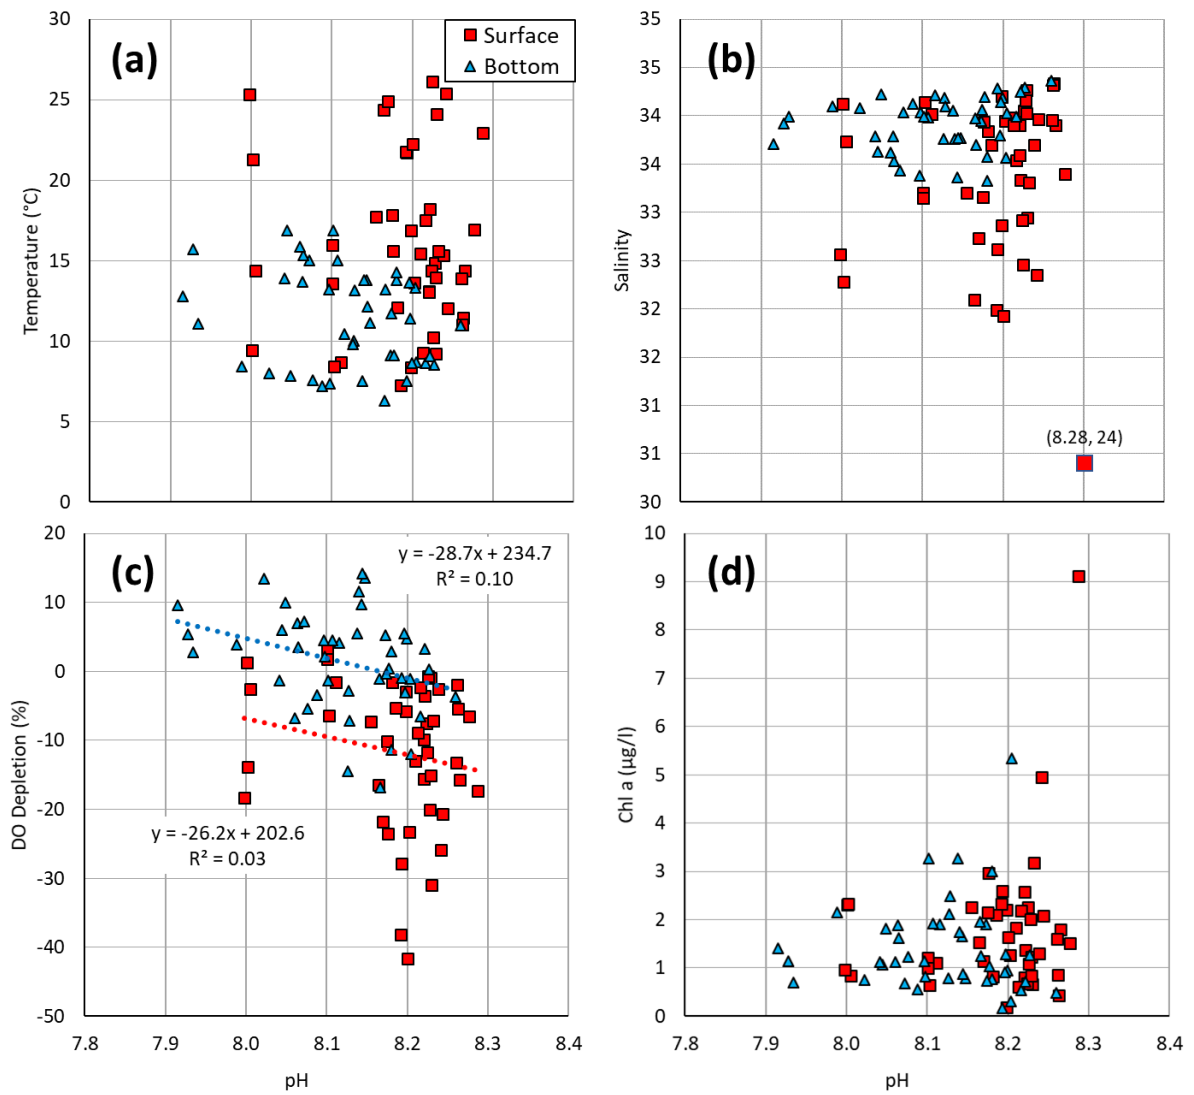

Figure S10. Variations of pH with (a) temperature, (b) salinity, (c) DO depletion, and (d) chlorophyll-a in waters from the east coast of Korea.

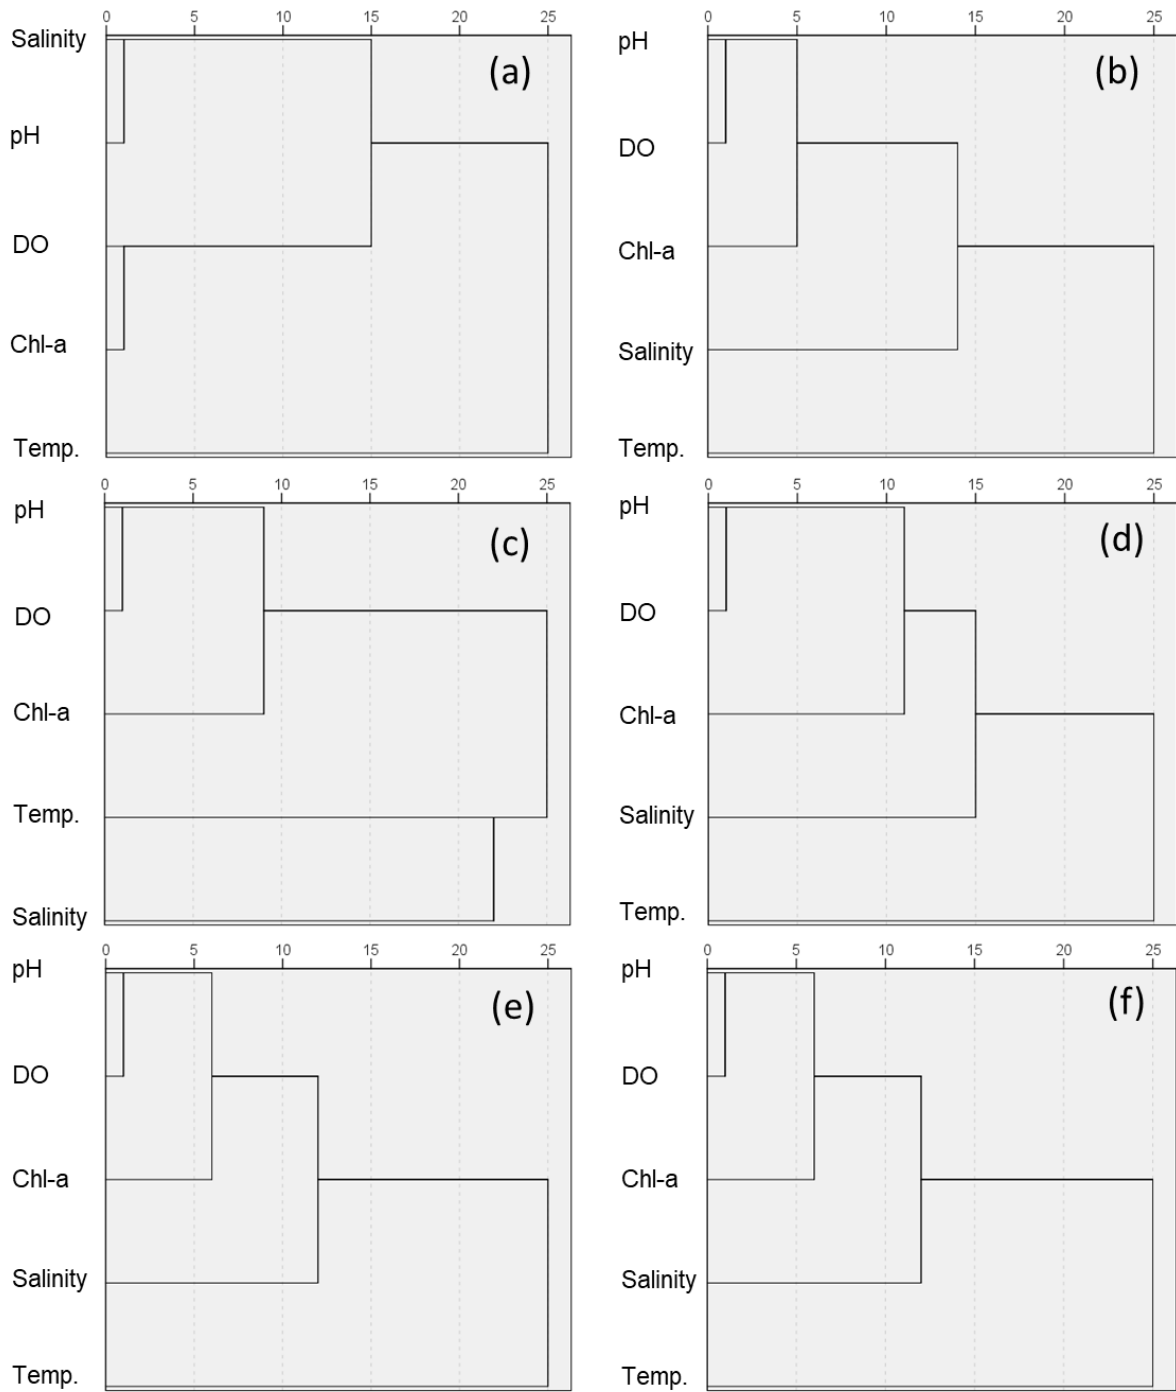

Figure S11. Hierarchical cluster analysis of parameters in coastal waters for: a) and b) the estuary, c) and d) the bay, and e) and f) the river mouth. The left columns (a, c, e) represent surface waters, while the right columns (b, d, f) represent bottom waters.



|                           |   |   |      |      |      |      |      |      |      |      |      |      |      |
|---------------------------|---|---|------|------|------|------|------|------|------|------|------|------|------|
| Jeonjupo Coast            | W | E | 6    | 6    | 6    | 6    | 8    | 8    | 8    | 8    | 8    | 8    | 8    |
| Mokpo Coast               | W | R | 4    | 4    | 4    | 4    | 8    | 8    | 8    | 8    | 8    | 8    | 8    |
| Muan Coast                | W | E | 3    | 3    | 3    | 3    | 3    | 3    | 3    | 3    | 3    | 3    | 3    |
| Shinan Coast              | W | E | 2    | 2    | 2    | 2    | 2    | 2    | 2    | 2    | 2    | 2    | 2    |
| Sihwa Lake                | W | E | 3    | 6    | 6    | 10   | 10   | 10   | 10   | 10   | 10   | 10   | 10   |
| Taeon Coast               | W | E | 5    | 5    | 5    | 5    | 5    | 5    | 5    | 5    | 5    | 5    | 5    |
| Tongyeong Coast           | W | E | 4    | 4    | 4    | 4    | 4    | 4    | 4    | 4    | 4    | 4    | 4    |
| Donghae Coast             | E | E | 4    | 4    | 4    | 4    | 4    | 4    | 4    | 4    | 4    | 4    | 4    |
| Gampo Coast               | E | E | 4    | 4    | 4    | 4    | 4    | 4    | 4    | 4    | 4    | 4    | 4    |
| Ganggu Coast              | E | E | 2    | 2    | 2    | 2    | 2    | 2    | 2    | 2    | 2    | 2    | 2    |
| Gangneung Coast           | E | E | 7    | 7    | 7    | 7    | 7    | 7    | 7    | 7    | 7    | 7    | 7    |
| Geojin Coast              | E | E | 2    | 2    | 2    | 2    | 2    | 2    | 2    | 2    | 2    | 2    | 2    |
| Guryongpo Coast           | E | E | 2    | 2    | 2    | 2    | 2    | 2    | 2    | 2    | 2    | 2    | 2    |
| Hupo Coast                | E | E | 2    | 2    | 2    | 2    | 2    | 2    | 2    | 2    | 2    | 2    | 2    |
| Jukbyeon Coast            | E | E | 6    | 6    | 6    | 6    | 6    | 6    | 6    | 6    | 6    | 6    | 6    |
| Jumunjin Coast            | E | E | 5    | 5    | 5    | 5    | 5    | 5    | 5    | 5    | 5    | 5    | 5    |
| Chuksan coast             | E | E | 2    | 2    | 2    | 2    | 2    | 2    | 2    | 2    | 2    | 2    | 2    |
| Onsan Coast               | E | E | 3    | 3    | 3    | 3    | 9    | 9    | 9    | 9    | 9    | 9    | 9    |
| Samcheok Coast            | E | E | 4    | 4    | 4    | 4    | 4    | 4    | 4    | 4    | 4    | 4    | 4    |
| Sokcho Coast              | E | E | 4    | 4    | 4    | 4    | 4    | 4    | 4    | 4    | 4    | 4    | 4    |
| Ulsan coast               | E | E | 5    | 5    | 5    | 12   | 12   | 12   | 12   | 12   | 12   | 12   | 12   |
| Wolpo Coast               | E | E | 2    | 2    | 2    | 2    | 2    | 2    | 2    | 2    | 2    | 2    | 2    |
| Yangpichun estuary        | E | E | -    | -    | -    | -    | -    | -    | -    | 4    | 4    | 4    | 4    |
| Yangyang Coast            | E | E | 4    | 4    | 4    | 4    | 4    | 4    | 4    | 4    | 4    | 4    | 4    |
| Youngil Bay               | E | B | 12   | 12   | 12   | 12   | 12   | 12   | 12   | 12   | 12   | 12   | 12   |
| <i>Total (each time)</i>  |   |   | 279  | 282  | 282  | 317  | 347  | 347  | 347  | 355  | 355  | 355  | 355  |
| <i>Frequency per year</i> |   |   | 4    | 4    | 4    | 4    | 4    | 4    | 4    | 4    | 4    | 4    | 4    |
| <i>Total (per year)</i>   |   |   | 1116 | 1128 | 1128 | 1268 | 1388 | 1388 | 1388 | 1420 | 1420 | 1420 | 1420 |

\* S, W, and E in column "Coast" represent south, west, and east, respectively.

\*\* E, B, and R in column "Type" represent estuary, bay, and river mouth, respectively.







Table S4. Liner regression of the centered moving average against time.

|                |         | Surface             |          |          |              |                |                 | Bottom              |          |         |              |                |                 |
|----------------|---------|---------------------|----------|----------|--------------|----------------|-----------------|---------------------|----------|---------|--------------|----------------|-----------------|
|                |         | Temperature<br>(°C) | Salinity | pH       | DO<br>(mg/l) | DO Dep.<br>(%) | Chl-a<br>(µg/l) | Temperature<br>(°C) | Salinity | pH      | DO<br>(mg/l) | DO Dep.<br>(%) | Chl-a<br>(µg/l) |
| Slope          | Entire  | 0.001               | 0.0004   | 0.00003  | -0.0003      | 0.001          | -0.001          | 0.001               | 0.0002   | 0.00004 | -0.0002      | -0.001         | -0.001          |
| R <sup>2</sup> |         | 0.526               | 0.212    | 0.293    | 0.312        | 0.018          | 0.364           | 0.622               | 0.164    | 0.291   | 0.203        | 0.037          | 0.456           |
| Slope          | South   | 0.001               | 0.0001   | 0.0001   | -0.0002      | 0.001          | -0.001          | 0.001               | -0.0001  | 0.0001  | 0.0000       | -0.002         | -0.001          |
| R <sup>2</sup> |         | 0.538               | 0.017    | 0.359    | 0.168        | 0.014          | 0.301           | 0.487               | 0.028    | 0.432   | 0.004        | 0.143          | 0.446           |
| Slope          | West    | 0.001               | 0.001    | 0.00002  | -0.0004      | 0.0004         | -0.002          | 0.001               | 0.001    | 0.00003 | -0.0003      | -0.001         | -0.002          |
| R <sup>2</sup> |         | 0.339               | 0.384    | 0.110    | 0.378        | 0.008          | 0.296           | 0.375               | 0.267    | 0.102   | 0.324        | 0.015          | 0.325           |
| Slope          | East    | 0.001               | 0.0003   | -0.00001 | -0.0002      | -0.0001        | -0.001          | 0.002               | 0.0000   | -0.0001 | -0.0005      | 0.002          | -0.001          |
| R <sup>2</sup> |         | 0.230               | 0.030    | 0.019    | 0.048        | 0.0001         | 0.162           | 0.401               | 0.013    | 0.227   | 0.167        | 0.029          | 0.310           |
| Slope          | Estuary | 0.001               | 0.0004   | 0.00002  | -0.0002      | -0.0003        | -0.001          | 0.001               | 0.0002   | 0.00003 | -0.0002      | -0.002         | -0.001          |
| R <sup>2</sup> |         | 0.505               | 0.335    | 0.246    | 0.249        | 0.007          | 0.355           | 0.576               | 0.197    | 0.249   | 0.186        | 0.234          | 0.386           |
| Slope          | Bay     | 0.001               | 0.0004   | 0.00003  | -0.0004      | 0.003          | -0.002          | 0.001               | 0.0001   | 0.00005 | -0.0002      | -0.0004        | -0.002          |
| R <sup>2</sup> |         | 0.512               | 0.050    | 0.173    | 0.290        | 0.103          | 0.233           | 0.594               | 0.009    | 0.242   | 0.091        | 0.003          | 0.498           |
| Slope          | River   | 0.001               | 0.002    | 0.0001   | -0.0004      | 0.001          | -0.001          | 0.001               | 0.001    | 0.0001  | -0.0004      | 0.002          | -0.001          |
| R <sup>2</sup> |         | 0.241               | 0.346    | 0.345    | 0.291        | 0.007          | 0.167           | 0.285               | 0.232    | 0.269   | 0.343        | 0.049          | 0.217           |

\* The centered moving average (4) generated 40 data points out of 44 averaged data from February 2010 to November 2020.

Table S5. Correlation (R) of pH with temperature (Temp.), salinity, dissolved oxygen concentration (DO, mg/l), DO depletion (dep. %), and chlorophyll a concentration in surface and bottom waters.

| <i>Coast</i> |    | Surface |          |           |             |                           | Bottom |          |           |             |                           | <i>n</i> |
|--------------|----|---------|----------|-----------|-------------|---------------------------|--------|----------|-----------|-------------|---------------------------|----------|
|              |    | Temp.   | Salinity | DO (mg/L) | DO Dep. (%) | Chl-a ( $\mu\text{g/L}$ ) | Temp.  | Salinity | DO (mg/L) | DO Dep. (%) | Chl-a ( $\mu\text{g/L}$ ) |          |
| Entire       | pH | -0.11   | 0.16     | 0.36      | -0.39       | 0.18                      | -0.19  | 0.18     | 0.38      | -0.39       | 0.12                      | 14484    |
| South        | pH | -0.12   | 0.01     | 0.44      | -0.42       | 0.23                      | -0.29  | 0.12     | 0.55      | -0.53       | 0.15                      | 7368     |
| West         | pH | -0.23   | 0.19     | 0.39      | -0.38       | 0.22                      | -0.28  | 0.24     | 0.36      | -0.32       | 0.18                      | 4324     |
| East         | pH | -0.03   | -0.08    | 0.25      | -0.22       | 0.14                      | 0.13   | -0.06    | 0.23      | -0.32       | 0.09                      | 2792     |
| Estuary      | pH | -0.08   | 0.25     | 0.25      | -0.29       | 0.08                      | -0.10  | 0.18     | 0.27      | -0.30       | 0.09                      | 9892     |
| Bay          | pH | -0.17   | -0.01    | 0.54      | -0.51       | 0.30                      | -0.38  | 0.15     | 0.59      | -0.55       | 0.21                      | 3688     |
| River        | pH | -0.12   | 0.26     | 0.43      | -0.57       | 0.20                      | -0.30  | 0.34     | 0.39      | -0.43       | 0.04                      | 904      |
